# Supplementary material
Source: publisher figshare collection journal article supplement (https://sage.figshare.com/ndownloader/files/12754493)
Supplement: Supplementary file 1 [file 12754493]

| **Supplementary Table A2** Proportions of gender-specific birth cohorts reaching age 75 and 90 years by country | | | | | | | | | | | | | | | | | | | | | | | | |
| --- | --- | --- | --- | --- | --- | --- | --- | --- | --- | --- | --- | --- | --- | --- | --- | --- | --- | --- | --- | --- | --- | --- | --- | --- |
|  | **1900** | **1901** | **1902** | **1903** | **1904** | **1905** | **1906** | **1907** | **1908** | **1909** | **1910** | **1911** | **1912** | **2013** | **1914** | **1915** | **1916** | **1917** | **1918** | **1919** | **1920** | **1921** | **1922** | **1923** |
| **Females** | | | | | | | | | | | | | | | | | | | | | | | | |
| **75 years** | | | | | | | | | | | | | | | | | | | | | | | | |
| **Sweden** | 50.5 | 51.9 | 53.4 | 54.2 | 55.3 | 55.8 | 56.6 | 57.9 | 58.0 | 59.0 | 59.8 | 60.5 | 61.2 | 61.7 | 61.7 | 62.7 | 63.9 | 64.5 | 64.8 | 65.9 | 66.5 | 67.5 | 67.8 | 68.4 |
| **Norway** | 52.0 | 52.7 | 53.9 | 54.4 | 56.1 | 56.0 | 58.4 | 58.5 | 58.9 | 60.2 | 60.7 | 61.5 | 62.0 | 62.2 | 62.6 | 63.1 | 64.5 | 64.9 | 65.3 | 66.2 | 67.0 | 67.6 | 68.1 | 68.4 |
| **Iceland** | 49.9 | 48.1 | 46.7 | 50.6 | 53.3 | 52.3 | 52.8 | 49.1 | 49.9 | 52.9 | 54.8 | 57.1 | 57.5 | 58.6 | 58.8 | 58.5 | 60.4 | 62.0 | 61.8 | 59.1 | 61.8 | 64.6 | 64.8 |  |
| **Denmark** | 49.9 | 50.9 | 52.6 | 52.9 | 53.1 | 53.7 | 54.6 | 54.4 | 55.2 | 56.7 | 57.0 | 57.0 | 58.4 | 58.6 | 58.4 | 57.9 | 58.4 | 59.1 | 58.6 | 58.7 | 59.0 | 59.8 | 59.4 | 59.7 |
| **Finland** | 36.8 | 37.6 | 39.4 | 40.3 | 40.7 | 41.8 | 43.4 | 44.3 | 45.2 | 45.6 | 46.4 | 48.1 | 48.3 | 48.8 | 49.5 | 49.6 | 49.9 | 51.2 | 51.9 | 55.3 | 55.9 | 57.1 |  |  |
| **90 years** | | | | | | | | | | | | | | | | | | | | | | | | |
| **Sweden** | 13.4 | 13.9 | 14.8 | 15. | 15.9 | 16.4 | 16.9 | 17.4 | 17.8 | 18.3 | 18.7 | 19.2 | 19.9 | 20.2 | 20.3 | 21.0 | 21.9 | 22.4 | 22.6 | 23.6 | 24.1 | 25.0 | 24.9 | 25.8 |
| **Norway** | 13.4 | 14.0 | 14.2 | 14.8 | 15.2 | 15.4 | 16.2 | 16.8 | 16.9 | 17.7 | 17.9 | 18.5 | 18.9 | 19.0 | 19.7 | 20.2 | 21.3 | 21.9 | 22.3 | 23.2 | 24.1 | 24.8 | 25.6 | 25.6 |
| **Iceland** | 17.2 | 15.5 | 15.0 | 16.1 | 17.1 | 17.5 | 17.2 | 14.8 | 16.1 | 17.6 | 17.3 | 16.3 | 18.3 | 19.4 | 18.1 | 19.0 | 21.2 | 20.6 | 22.2 | 20.3 | 22.1 | 24.7 | 23.2 |  |
| **Denmark** | 12.7 | 13.7 | 14.1 | 14.4 | 14.5 | 14.7 | 15.0 | 14.9 | 15.5 | 15.9 | 16.6 | 16.5 | 17.1 | 17.1 | 17.5 | 17.3 | 17.9 | 18.1 | 18.2 | 18.2 | 19.0 | 19.3 | 19.3 | 19.9 |
| **Finland** | 7.8 | 8.3 | 8.5 | 9.0 | 8.9 | 9.5 | 9.8 | 10.3 | 10.9 | 11.3 | 11.6 | 12.7 | 13.0 | 13.3 | 13.7 | 14.5 | 15.1 | 16.3 | 16.6 | 18.1 | 18.9 | 20.0 |  |  |
| **Males** | | | | | | | | | | | | | | | | | | | | | | | | |
| **75 years** | | | | | | | | | | | | | | | | | | | | | | | | |
| **Sweden** | 38.3 | 39.4 | 40.7 | 41.1 | 41.5 | 41.5 | 42.5 | 43.3 | 43.2 | 44.2 | 44.8 | 45.0 | 45.6 | 46.1 | 45.9 | 46.7 | 47.8 | 48.3 | 48.2 | 49.6 | 49.8 | 51.3 | 51.4 | 52.6 |
| **Norway** | 37.0 | 37.9 | 38.9 | 39.1 | 39.5 | 39.6 | 41.3 | 41.3 | 41.6 | 42.6 | 42.7 | 43.2 | 43.2 | 43.5 | 43.4 | 43.5 | 44.4 | 45.5 | 45.3 | 46.3 | 47.3 | 47.34 | 48.2 | 49.5 |
| **Iceland** | 36.8 | 36.2 | 36.7 | 40.3 | 41.1 | 38.1 | 39.9 | 35.6 | 37.6 | 39.7 | 42.9 | 43.6 | 42.8 | 43.3 | 41.1 | 43.6 | 43.8 | 43.5 | 47.6 | 47.0 | 47.4 | 51.8 | 49.8 |  |
| **Denmark** | 36.9 | 37.4 | 38.5 | 38.4 | 38.3 | 38.6 | 38.8 | 38.6 | 39.3 | 40.3 | 41.0 | 41.3 | 41.9 | 42.4 | 42.1 | 42 | 41.7 | 42.8 | 42.7 | 43.0 | 42.9 | 43.1 | 43.2 | 43.6 |
| **Finland** | 19.3 | 19.9 | 20.6 | 21.1 | 21.0 | 21.5 | 22.4 | 22.7 | 23.2 | 23.7 | 23.8 | 24.4 | 24.7 | 24.4 | 25.2 | 25.2 | 25.3 | 25.7 | 26.2 | 28.6 | 28.9 | 29.9 |  |  |
| **90 years** | | | | | | | | | | | | | | | | | | | | | | | | |
| **Sweden** | 5.4 | 5.6 | 6.0 | 6.1 | 6.3 | 6.5 | 6.7 | 7.0 | 7.1 | 7.3 | 7.6 | 7.9 | 7.9 | 8.3 | 8.6 | 8.7 | 9.4 | 9.7 | 10.0 | 10.8 | 10.9 | 11.7 | 11.9 | 12.6 |
| **Norway** | 5.1 | 5.6 | 5.7 | 6.1 | 5.9 | 5.8 | 6.1 | 6.1 | 6.2 | 6.3 | 6.6 | 6.9 | 6.9 | 7.2 | 7.2 | 7.3 | 7.9 | 8.2 | 8.7 | 9.1 | 9.6 | 9.7 | 10.6 | 10.9 |
| **Iceland** | 7.1 | 7.3 | 8.6 | 8.7 | 8.6 | 9.0 | 7.7 | 7.2 | 8.1 | 8.3 | 7.4 | 9.2 | 9.8 | 9.6 | 8.4 | 9.8 | 9.7 | 9.4 | 11.2 | 10.8 | 11.6 | 11.0 | 14.6 |  |
| **Denmark** | 5.3 | 5.3 | 5.5 | 5.5 | 5.4 | 5.3 | 5.4 | 5.3 | 5.6 | 5.8 | 6.1 | 6.3 | 6.6 | 6.5 | 6.7 | 6.7 | 7.0 | 7.1 | 7.4 | 7.4 | 7.8 | 8.1 | 8.2 | 8.5 |
| **Finland** | 2.2 | 2.4 | 2.3 | 2.5 | 2.5 | 2.8 | 2.8 | 2.9 | 3.2 | 3.1 | 3.2 | 3.6 | 3.6 | 3.7 | 3.8 | 4.1 | 4.5 | 4.5 | 4.9 | 5.7 | 5.6 | 6.2 |  |  |
